# Supplementary material
Source: PubMed Central journal article supplement (PMC3194060)

## Supplementary Figure 1

### SNP array profiles

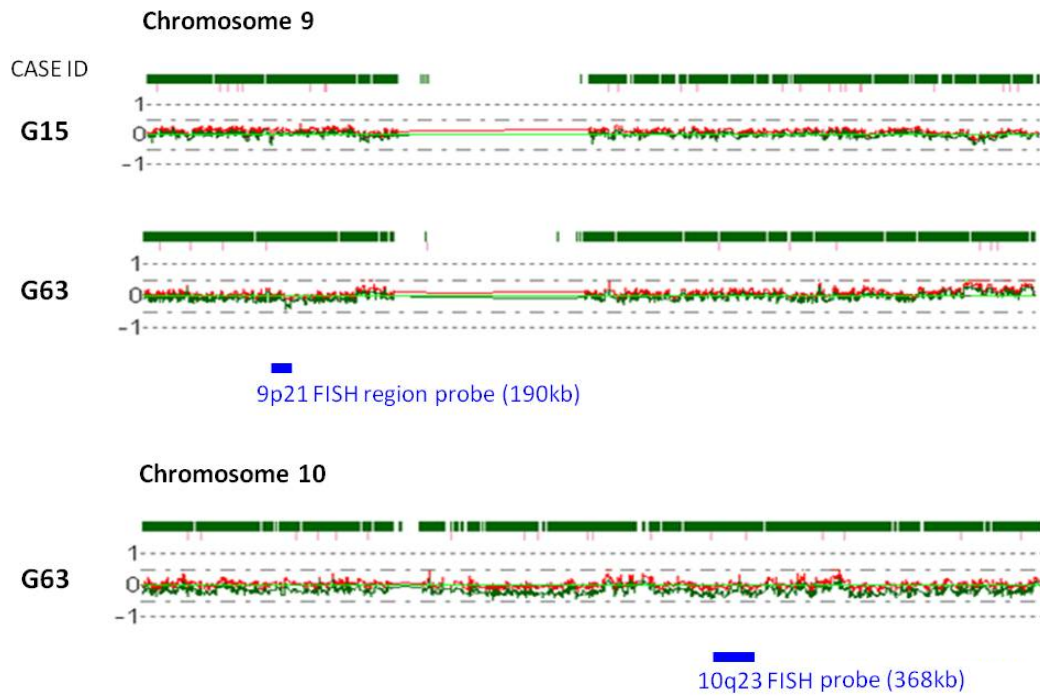

Supplement: mmc1.pdf [file mmc1.pdf]
